# Supplementary material for: Evaluating the taxa that provide shared pollination services across multiple crops and regions
Source: PubMed Central journal article supplement (PMC6753147; doi:10.1038/s41598-019-49535-w), 2019-09-19
Supplement: 41598_2019_49535_MOESM1_ESM.pdf [file 41598_2019_49535_MOESM1_ESM.pdf]

## Supplementary Information

### Evaluating the taxa that provide shared pollination services across multiple crops and regions

Bryony K. Willcox<sup>1\*</sup>, Brad G. Howlett<sup>2</sup>, Andrew J. Robson<sup>3</sup>, Brian Cutting<sup>4</sup>, Lisa Evans<sup>4</sup>, Linley Jesson<sup>5</sup>, Lindsey Kirkland<sup>1</sup>, Malou Jean-Meyzonnier<sup>6</sup>, Victoria Potdevin<sup>6</sup>, Manu E. Saunders<sup>1,7</sup> and Romina Rader<sup>1</sup>

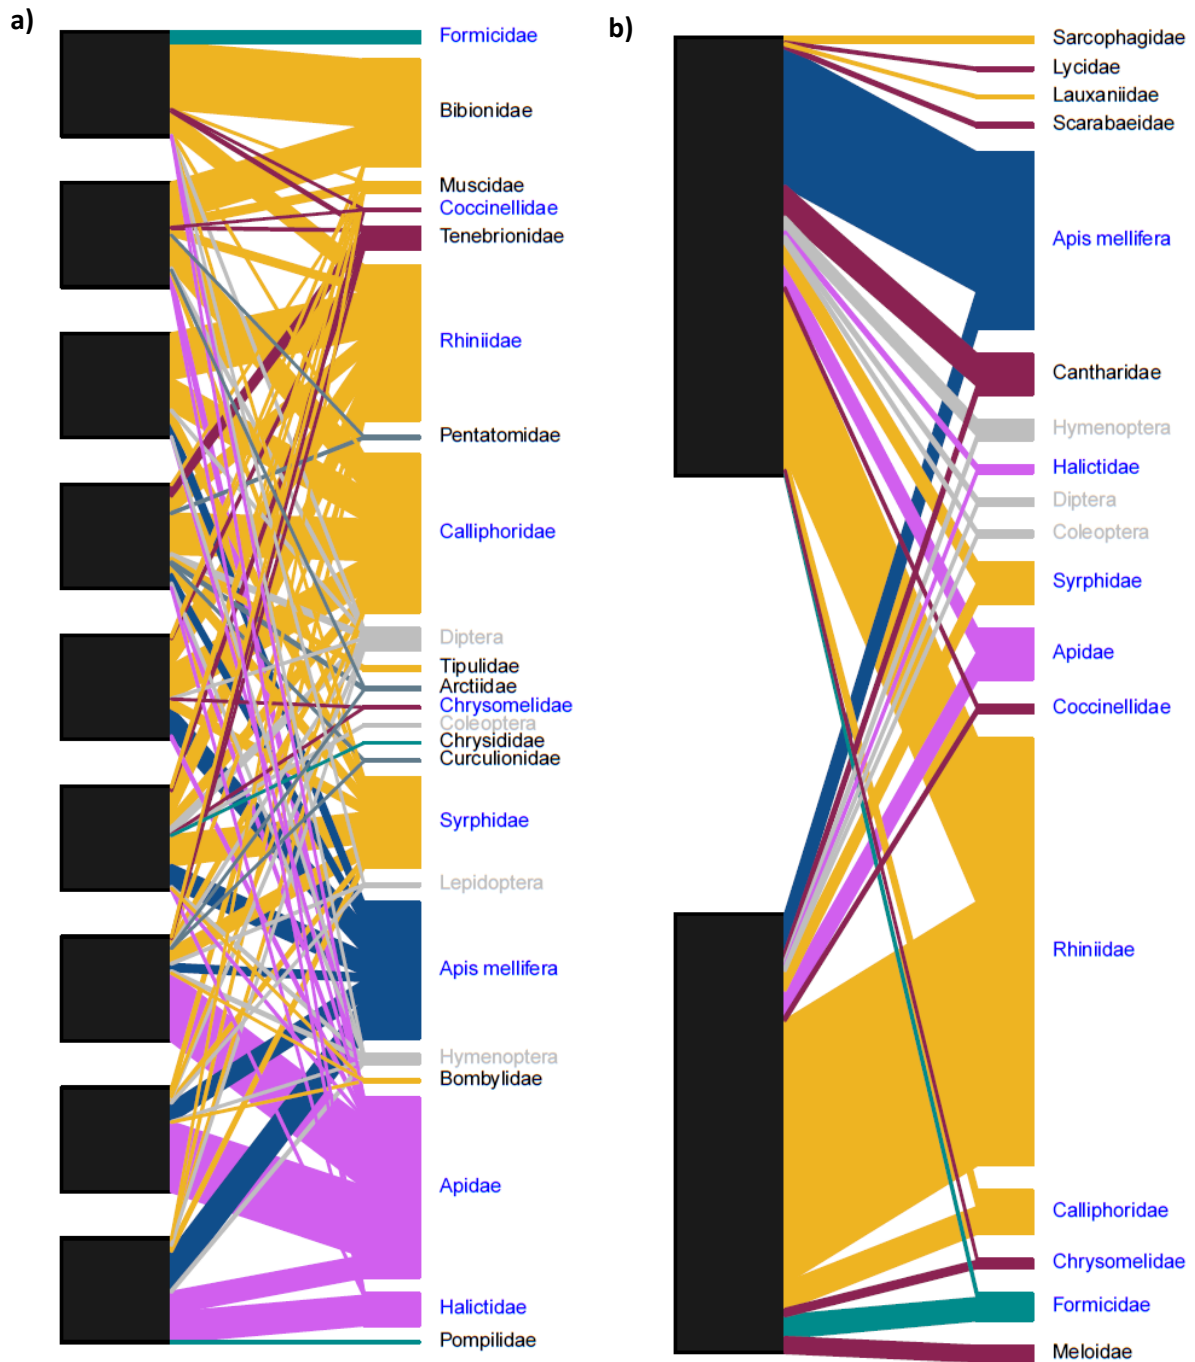

**SI Figure 1:** Family level flower visitor networks of mango orchard sites in a) Mareeba, QLD and b) Bundaberg during flowering in 2016. Black boxes indicate orchard sites. Visitor group labels colour coded to indicate shared groups (blue), unique groups (black) and unidentified visitors grouped to order (grey).

**SI Table 1.** Genera of shared families present in avocado across regions.

| Taxonomic family | Bundaberg (Queensland) |                                                                  | Sunraysia (New South Wales/Victoria/South Australia) |                                            |
|------------------|------------------------|------------------------------------------------------------------|------------------------------------------------------|--------------------------------------------|
|                  | Species Strength       | Genera present                                                   | Species Strength                                     | Genera present                             |
| Calliphoridae    | 0.7                    | <i>Chrysomya, Lucilia</i>                                        | 1.3                                                  | <i>Chrysomya, Lucilia, Calliphora</i>      |
| Chrysomelidae    | 0.9                    | <i>Monolepta</i>                                                 | 0.11                                                 | <i>Monolepta</i>                           |
| Coccinellidae    | 2.14                   | <i>Coccinella, Halmus, Micraspis</i>                             | 3.31                                                 | <i>Coccinella, Harmonia</i>                |
| Formicidae       | 0.4                    | <i>Iridomyrmex, Rhytidoponera</i> +                              | 0.9                                                  | <i>Iridomyrmex, Rhytidoponera</i> +        |
| Halictidae       | 0.14                   | <i>Lassioglossum</i>                                             | 0.03                                                 | <i>Lassioglossum</i>                       |
| Lauxaniidae      | 0.14                   | -                                                                | 1.1                                                  | -                                          |
| Lycidae          | 0.86                   | <i>Lycid</i>                                                     | 0.03                                                 | <i>Lycid</i>                               |
| Muscidae         | 0.14                   | <i>Helina</i>                                                    | 0.43                                                 | <i>Australphyra, Helina</i> +              |
| Rhiniidae        | 0.85                   | <i>Stomorhina, Chlororhinia</i>                                  | 0.9                                                  | <i>Stomorhina, Metallea</i>                |
| Sarcophagidae    | 0.14                   | <i>Sarcophaga</i>                                                | 0.22                                                 | <i>Sarcophaga</i>                          |
| Syrphidae        | 0.86                   | <i>Eristalinus, Simosyrphus</i><br><i>Neoplesia, Cyphipeltus</i> | 4.99                                                 | <i>Eristalinus, Simosyrphus, Neoplesia</i> |
| Managed Apidae   | 2.9                    | <i>Apis mellifera</i>                                            | 0.93                                                 | <i>Apis mellifera</i>                      |

- specimens not identified any further than family

+ additional specimens present, not identified to genus

**SI Table 2.** Genera of shared families present in mango across regions.

| Taxonomic family | Bundaberg (Queensland) |                                                                  | Mareeba (Queensland) |                                                                                          |
|------------------|------------------------|------------------------------------------------------------------|----------------------|------------------------------------------------------------------------------------------|
|                  | Species Strength       | Genera present                                                   | Species Strength     | Genera present                                                                           |
| Apidae           | 0.11                   | <i>Tetragonula, Xylocopa</i>                                     | 1.72                 | <i>Tetragonula, Xylocopa, Apis</i> *                                                     |
| Calliphoridae    | 0.1                    | <i>Chrysomya, Calliphora, Lucilia</i>                            | 1.5                  | <i>Chrysomya, Lucilia, Metallea</i>                                                      |
| Chrysomelidae    | 0.02                   | <i>Monolepta</i>                                                 | 0.01                 | <i>Monolepta</i>                                                                         |
| Coccinellidae    | 0.02                   | <i>Coccinella, Micraspis</i>                                     | 0.01                 | <i>Coccinella</i>                                                                        |
| Formicidae       | 0.06                   | <i>Iridomyrmex, Rhytidoponera</i> +                              | 0.1                  | -                                                                                        |
| Halictidae       | 0.02                   | <i>Homalictus</i>                                                | 0.3                  | <i>Homalictus, Hylaeus</i>                                                               |
| Rhiniidae        | 0.97                   | <i>Stomorhina</i>                                                | 1.5                  | <i>Stomorhina</i>                                                                        |
| Syrphidae        | 0.1                    | <i>Eristalinus, Simosyrphus</i><br><i>Neoplesia, Cyphipeltus</i> | 0.9                  | <i>Eristalinus, Allobacha, Allograpta</i><br><i>Mesembrius, Melanstoma, Orthoprosopa</i> |
| Managed Apidae   | 0.4                    | <i>Apis mellifera</i>                                            | 1.3                  | <i>Apis mellifera</i>                                                                    |

- specimens not identified any further than family

+ additional specimens present, not identified to genus

\* feral *Apis cerana* present

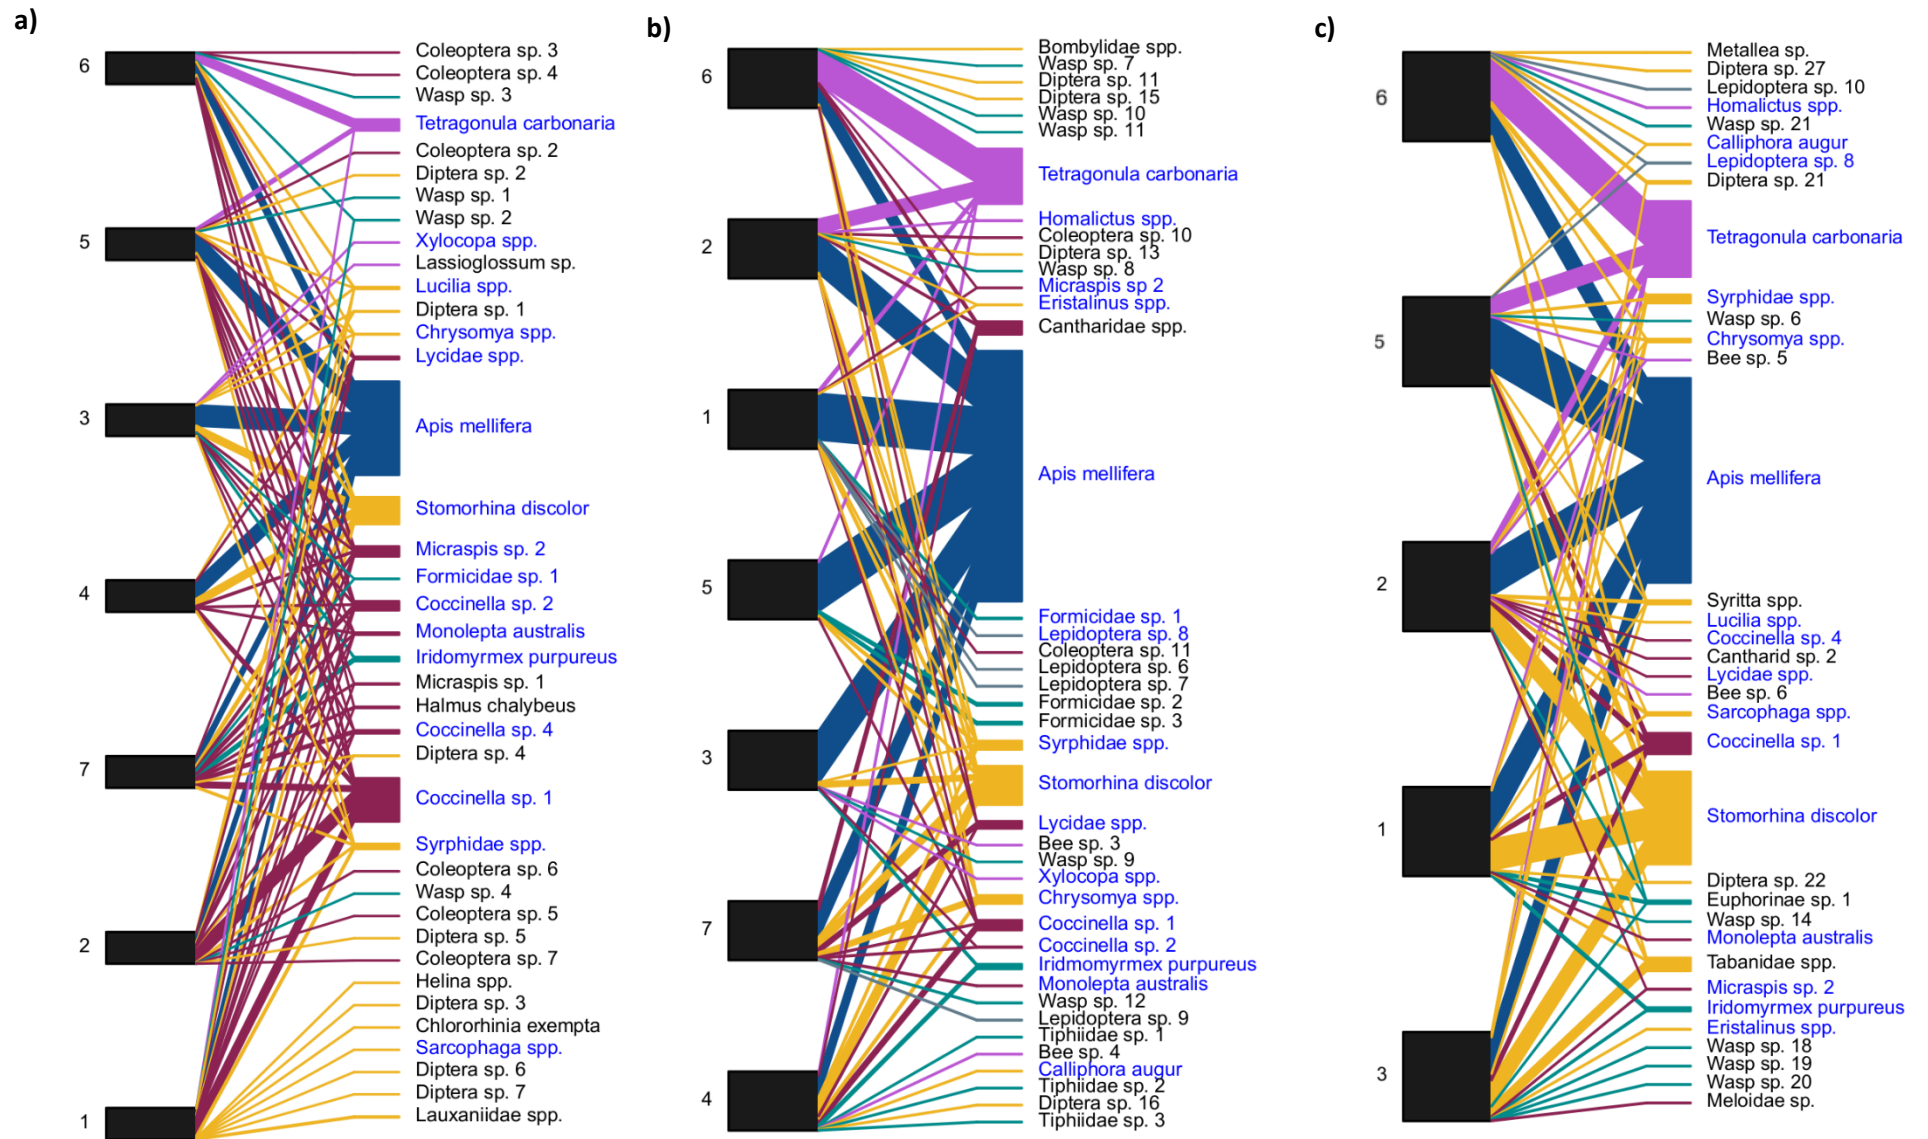

**SI Figure 2:** Avocado orchard site visitation networks across three years a) 2015; b) 2016; and c) 2017 (sites 4 and 7 were not surveyed in 2017). Black nodes represent orchard sites and blue text indicates species groups present across all three years.

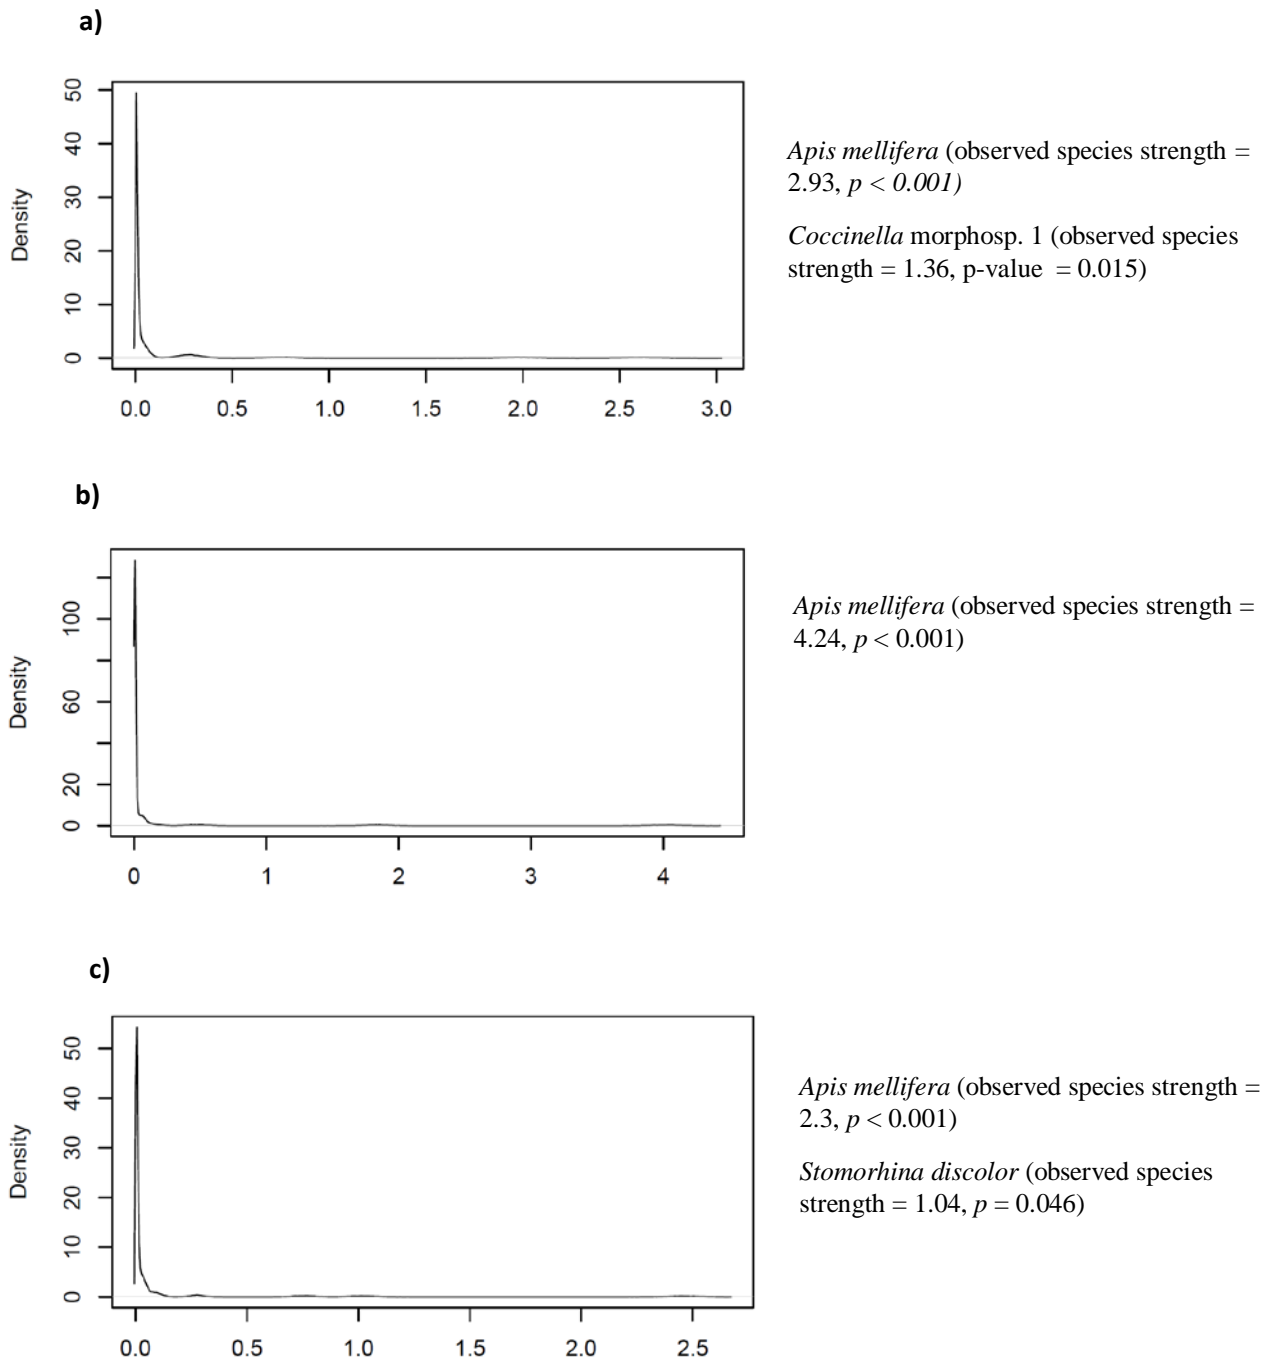

**SI Figure 3:** Null model distributions for species strength values (x axis) in avocado visitation pollinator networks and significant observed species in: a) 2015; b) 2016; and c) 2017.

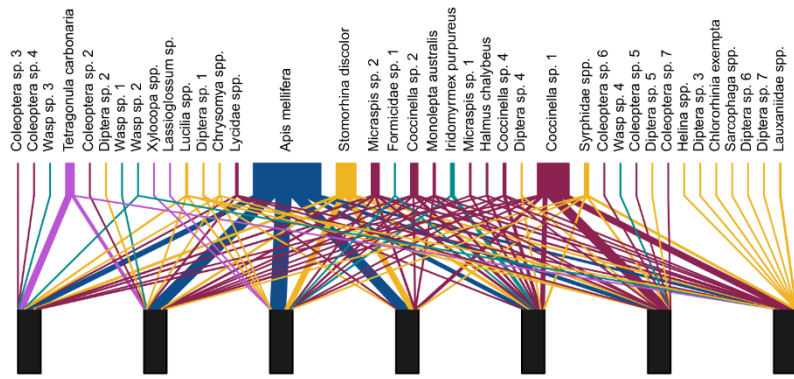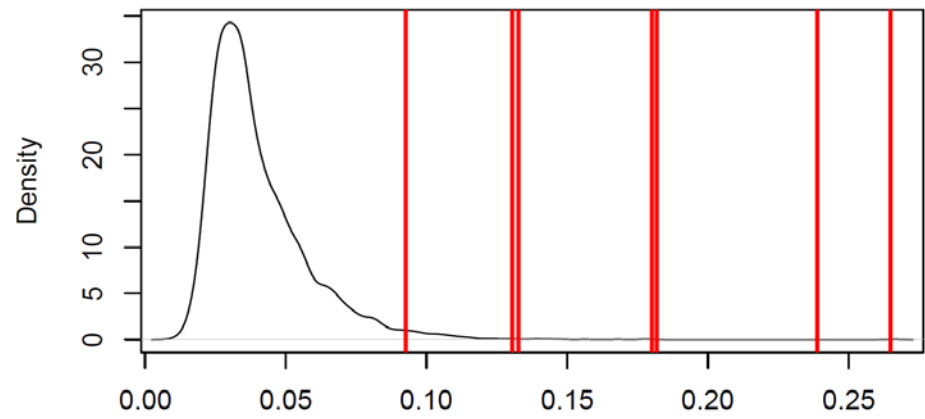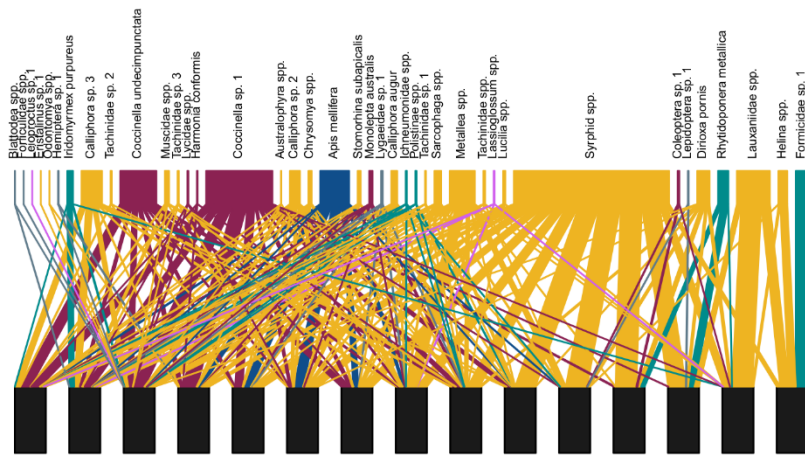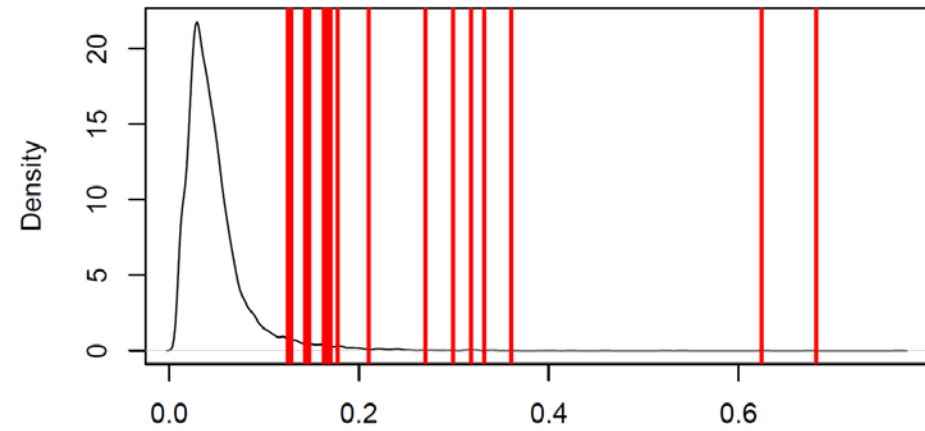

**SI Figure 4:** Visitation network and null distribution models for orchard site specialisation ( $d'$ ). Red lines indicate observed orchard site specialisation ( $d'$ ) values. Region, crop & year: Top pair) Bundaberg avocado, 2015 and Bottom pair) Sunraysia avocado, 2015.

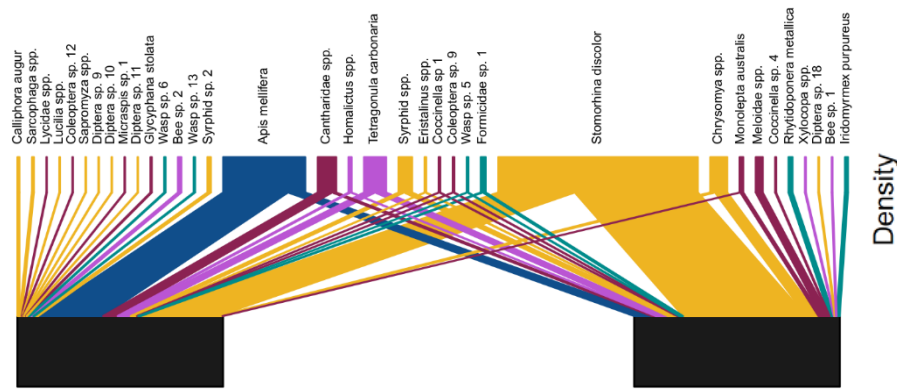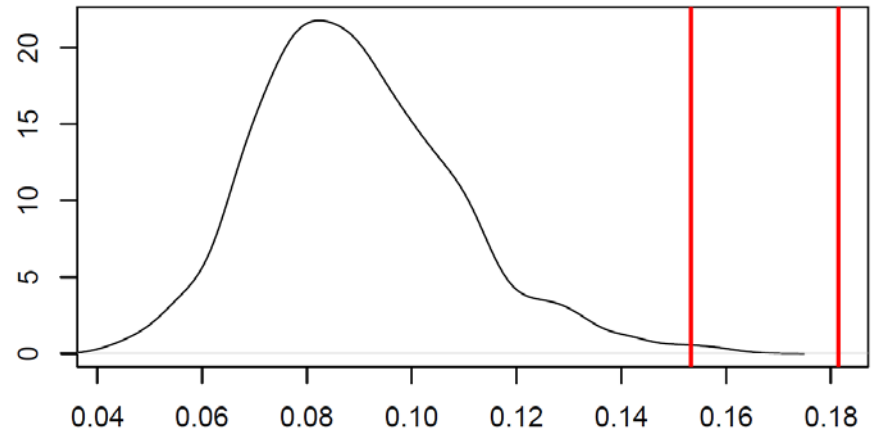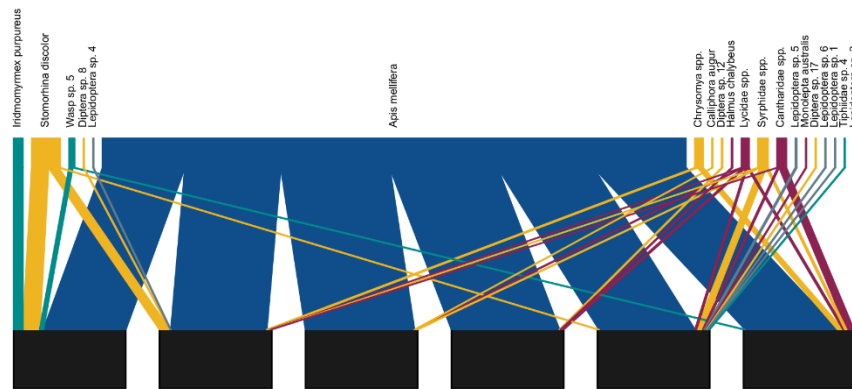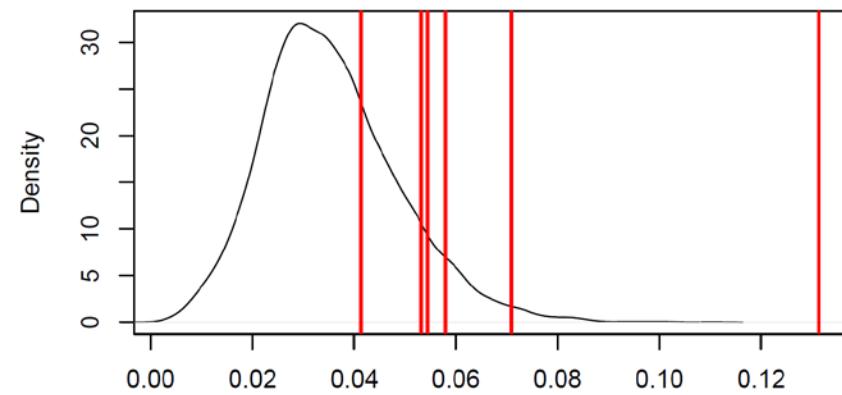

**SI Figure 5:** Visitation network and null distribution models for orchard site specialisation ( $d'$ ). Red lines indicate observed orchard site specialisation ( $d'$ ) values. Region, crop & year: Top pair) Bundaberg mango, 2016 and Bottom pair) Bundaberg macadamia, 2016.





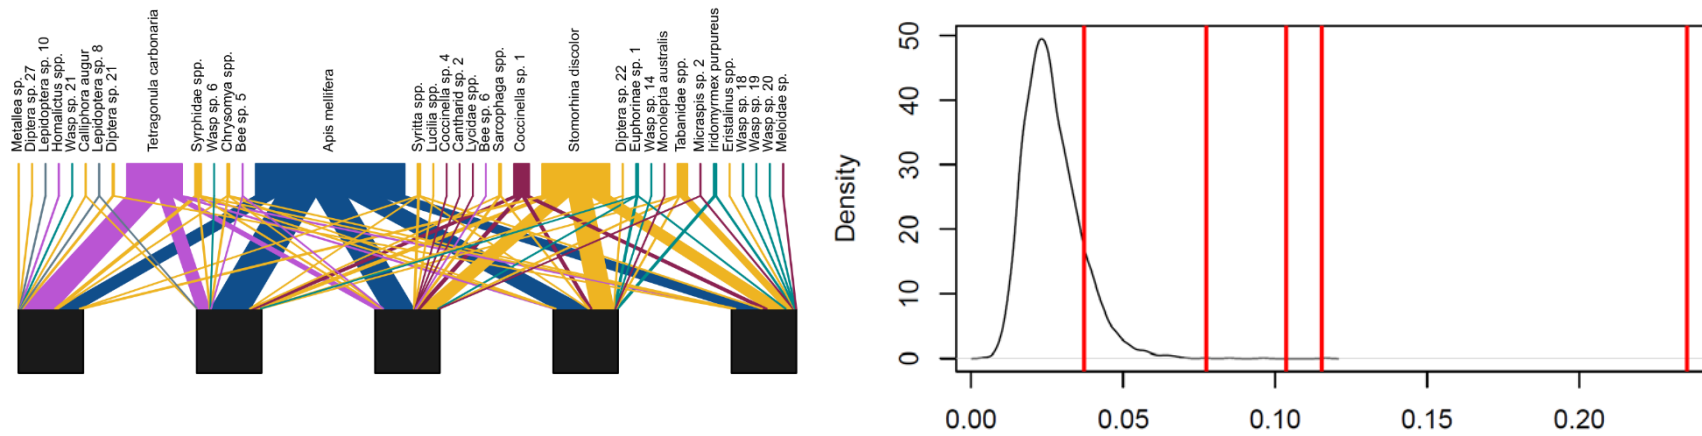

**SI Figure 7:** Visitation network and null distribution models for site level specialisation ( $d'$ ). Red lines indicate observed site level specialisation ( $d'$ ) values. Region, crop & year: Bundaberg avocado, 2017.

**SI Table 3:** Minimum adequate GLM models describing the influence of landscape composition on orchard site specialisation (d').

| Predictor variables                    | Estimate  | Std. Error | t value | Pr(> t ) |
|----------------------------------------|-----------|------------|---------|----------|
| <i>Avocado – Sunraysia, 2015, 500m</i> |           |            |         |          |
| (Intercept)                            | -1.147934 | 0.903754   | -1.270  | 0.245    |
| Native vegetation (grazing)            | -0.005833 | 0.027148   | -0.215  | 0.836    |
| Irrigated perennial horticulture       | 0.004830  | 0.012232   | 0.395   | 0.705    |
| <i>Avocado – Sunraysia, 2015, 1km</i>  |           |            |         |          |
| (Intercept)                            | -1.17545  | 1.11182    | -1.057  | 0.331    |
| Conservation areas                     | -0.01813  | 0.03519    | -0.515  | 0.625    |
| Native vegetation (grazing)            | 0.00103   | 0.02584    | 0.04    | 0.97     |
| Irrigated perennial horticulture       | 0.00702   | 0.01733    | 0.406   | 0.699    |
| <i>Avocado – Sunraysia, 2015, 2km</i>  |           |            |         |          |
| (Intercept)                            | 0.04744   | 2.38913    | 0.02    | 0.985    |
| Conservation areas                     | 0.0016    | 0.02262    | 0.071   | 0.946    |
| Native vegetation (grazing)            | -0.0012   | 0.01907    | -0.063  | 0.952    |
| Irrigated perennial horticulture       | 0.00535   | 0.02058    | 0.26    | 0.803    |
| <i>Avocado – Bundaberg, 2015, 500m</i> |           |            |         |          |
| (Intercept)                            | -8.39696  | 3.92085    | -2.142  | 0.166    |
| Native vegetation (grazing)            | 0.06869   | 0.04033    | 1.703   | 0.231    |
| Irrigated perennial horticulture       | 0.08460   | 0.04743    | 1.784   | 0.216    |
| Native forests (production)            | 0.08098   | 0.04218    | 1.920   | 0.195    |
| Irrigated cropping                     | 0.06392   | 0.03920    | 1.630   | 0.245    |
| <i>Avocado – Bundaberg, 2015, 1km</i>  |           |            |         |          |
| (Intercept)                            | -4.38383  | 1.57379    | -2.786  | 0.108    |
| Native vegetation (grazing)            | 0.03000   | 0.01739    | 1.725   | 0.227    |
| Irrigated perennial horticulture       | 0.04364   | 0.02464    | 1.771   | 0.219    |
| Native forests (production)            | 0.03213   | 0.01681    | 1.912   | 0.196    |
| Irrigated cropping                     | 0.02455   | 0.01620    | 1.516   | 0.269    |
| <i>Avocado – Bundaberg, 2016, 500m</i> |           |            |         |          |
| (Intercept)                            | 1.21419   | 5.84911    | 0.208   | 0.855    |
| Native vegetation (grazing)            | -0.03652  | 0.06197    | -0.589  | 0.615    |
| Irrigated perennial horticulture       | -0.03036  | 0.07326    | -0.414  | 0.719    |
| Native forests (production)            | -0.01407  | 0.06223    | -0.226  | 0.842    |
| Irrigated cropping                     | -0.02715  | 0.05791    | -0.469  | 0.685    |
| <i>Avocado – Bundaberg, 2016, 1km</i>  |           |            |         |          |
| (Intercept)                            | -1.292805 | 2.967391   | -0.436  | 0.706    |
| Native vegetation (grazing)            | -0.008103 | 0.033530   | -0.242  | 0.832    |
| Irrigated perennial horticulture       | 0.008203  | 0.051521   | 0.159   | 0.888    |
| Native forests (production)            | 0.002983  | 0.031919   | 0.093   | 0.934    |
| Irrigated cropping                     | -0.006922 | 0.031383   | -0.221  | 0.846    |
| <i>Avocado – Bundaberg, 2016, 2km</i>  |           |            |         |          |
| (Intercept)                            | -2.354797 | 3.356879   | -0.701  | 0.556    |
| Native vegetation (grazing)            | 0.010764  | 0.034719   | 0.310   | 0.786    |
| Irrigated perennial horticulture       | 0.014315  | 0.078489   | 0.182   | 0.872    |
| Native forests (production)            | 0.011657  | 0.037924   | 0.307   | 0.788    |
| Irrigated cropping                     | 0.004451  | 0.040646   | 0.110   | 0.923    |

**SI Table 3:** Continued.

| Predictor variables                      | Estimate  | Std. Error | t value | Pr(> t ) |
|------------------------------------------|-----------|------------|---------|----------|
| <i>Avocado – Bundaberg, 2017, 500m</i>   |           |            |         |          |
| (Intercept)                              | -2.715371 | 3.450610   | -0.787  | 0.576    |
| Native vegetation (grazing)              | 0.001647  | 0.042694   | 0.039   | 0.975    |
| Irrigated perennial horticulture         | 0.005365  | 0.045634   | 0.118   | 0.925    |
| Irrigated cropping                       | 0.016407  | 0.034788   | 0.472   | 0.719    |
| <i>Avocado – Bundaberg, 2017, 1km</i>    |           |            |         |          |
| (Intercept)                              | -2.710611 | 3.687194   | -0.735  | 0.596    |
| Native vegetation (grazing)              | 0.006771  | 0.044618   | 0.152   | 0.904    |
| Irrigated perennial horticulture         | 0.003371  | 0.069696   | 0.048   | 0.969    |
| Irrigated cropping                       | 0.010210  | 0.035670   | 0.286   | 0.823    |
| <i>Avocado – Bundaberg, 2017, 2km</i>    |           |            |         |          |
| (Intercept)                              | -3.53326  | 3.04285    | -1.161  | 0.453    |
| Native vegetation (grazing)              | 0.01304   | 0.03115    | 0.419   | 0.748    |
| Irrigated perennial horticulture         | 0.03101   | 0.09590    | 0.323   | 0.801    |
| Irrigated cropping                       | 0.01961   | 0.03269    | 0.600   | 0.656    |
| <i>Macadamia – Bundaberg, 2016, 500m</i> |           |            |         |          |
| (Intercept)                              | -1.222288 | 1.412330   | -0.865  | 0.478    |
| Native vegetation (grazing)              | 0.003163  | 0.016045   | 0.197   | 0.862    |
| Irrigated perennial horticulture         | -0.017177 | 0.015608   | -1.101  | 0.386    |
| Irrigated cropping                       | -0.020907 | 0.014461   | -1.446  | 0.285    |
| <i>Macadamia – Bundaberg, 2016, 2km</i>  |           |            |         |          |
| (Intercept)                              | 0.432591  | 6.638195   | 0.065   | 0.954    |
| Native vegetation (grazing)              | 0.003365  | 0.072490   | 0.046   | 0.967    |
| Irrigated perennial horticulture         | -0.032559 | 0.074075   | -0.440  | 0.703    |
| Irrigated cropping                       | -0.044929 | 0.079847   | -0.563  | 0.630    |
| <i>Mango – Mareeba, 2016, 500m</i>       |           |            |         |          |
| (Intercept)                              | 0.260178  | 0.811863   | 0.320   | 0.762    |
| Native vegetation (grazing)              | -0.002735 | 0.009564   | -0.286  | 0.786    |
| Irrigated perennial horticulture         | -0.023709 | 0.013786   | -1.720  | 0.146    |
| Irrigated cropping                       | 0.020715  | 0.016421   | 1.261   | 0.263    |
| <i>Mango – Mareeba, 2016, 2km</i>        |           |            |         |          |
| (Intercept)                              | -1.432893 | 1.990086   | -0.720  | 0.504    |
| Native vegetation (grazing)              | 0.001270  | 0.026940   | 0.047   | 0.964    |
| Irrigated perennial horticulture         | 0.008398  | 0.025074   | 0.335   | 0.751    |
| Irrigated cropping                       | 0.040213  | 0.055415   | 0.726   | 0.501    |

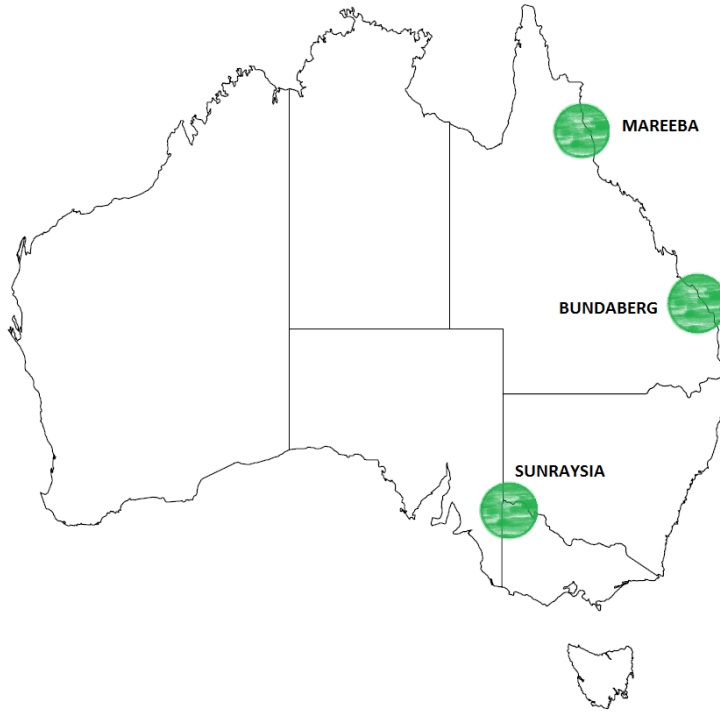

**SI Figure 8:** Map indicating study regions.

**SI Table 4.** Pollinator-crop visitation survey details.

| Crop      | Region    | Year | Cultivar | Sampling Period  | No. Orchard Sites | No. Surveys | Temp °C min-max | Humidity % min-max |
|-----------|-----------|------|----------|------------------|-------------------|-------------|-----------------|--------------------|
| Avocado   | Bundaberg | 2015 | Hass     | 12 – 29 Sept     | 7                 | 45          | 20.6 – 28.6     | 24.0 – 70.5        |
|           | Bundaberg | 2016 | Hass     | 12 – 27 Sept     | 7                 | 47          | 20.3 – 29.1     | 25.2 – 84.2        |
|           | Bundaberg | 2017 | Hass     | 30 Aug – 15 Sept | 5                 | 42          | 16.2 – 33.3     | 13.3 – 70.0        |
|           | Sunraysia | 2015 | Hass     | 9 – 28 Oct       | 16                | 50          | 16.4 – 35.4     | 17.0 – 66.0        |
| Macadamia | Bundaberg | 2016 | 741      | 26 – 30 Sept     | 6                 | 39          | 21.4 – 29.4     | 20.5 – 65.4        |
| Mango     | Bundaberg | 2016 | Calypso  | 11 – 19 Sept     | 2                 | 15          | 21.4 – 28.8     | 29.4 – 67.6        |
|           | Mareeba   | 2016 | Keitt    | 3 – 31 Aug       | 9                 | 100         | 12.7 – 33.1     | 26.5 – 82.0        |

**SI Table 5:** Pollinator groupings.

| Field visitor groups   | Taxonomic family | Genera/species of identified voucher specimens             | Region    |
|------------------------|------------------|------------------------------------------------------------|-----------|
| Syrphid spp.           | Syrphidae        | <i>Simosyrphus</i> , <i>Neoplesia</i> , <i>Cyphipeltus</i> | Bundaberg |
| Syrphid spp.           | Syrphidae        | <i>Simosyrphus</i> , <i>Neoplesia</i>                      | Sunraysia |
| Tachinidid spp.        | Tachinidae       | 3 species                                                  | Sunraysia |
| <i>Homalictus</i> spp. | Halictidae       | <i>Urbanus</i> , <i>Flindersi</i> , <i>Murrayi</i>         | Mareeba   |

**SI Table 6:** Mean SVD values for different visitors. Mean  $\pm$  se (n samples).

|                               | Crop                 |                      |                      |
|-------------------------------|----------------------|----------------------|----------------------|
|                               | Avocado              | Mango                | Macadamia            |
| Control stigmas               | 0.18 $\pm$ 0.4 (410) | 1.8 $\pm$ 0.3 (475)  | 0.16 $\pm$ 0.1 (13)  |
| <i>Apis mellifera</i>         | 1.6 $\pm$ 0.45 (86)  | 0.85 $\pm$ 0.55 (41) | 0.52 $\pm$ 0.21 (31) |
| <i>Tetragonula carbonaria</i> | 2.67 $\pm$ 0.67 (34) | 5.18 $\pm$ 3.18 (58) | NA                   |
| <i>Stomorhina discolor</i>    | 1.2 $\pm$ 0.38 (39)  | 2.42 $\pm$ 1.19 (50) | 0.42 $\pm$ 0.19 (12) |
| <i>Others</i>                 | 0.12 $\pm$ 0.14 (23) | 0.38 $\pm$ 0.91 (17) | 0.42 $\pm$ 0.19 (12) |

AUSTRALIAN LAND USE AND MANAGEMENT CLASSIFICATION Version 8 (October 2016)

| 1                                                                                                                                                                                                                                                                                                                                                                                                                                                                                                                                                                                                                                                            | 2                                                                                                                                                       | 3                                                                                                                                                                                                                                                                                                                                                                                                                                                                                                                                                                                                                                                                                                                                                                                                                                                                                                                                                                                                                                                                                                                                                                                                               | 4                                                                                                                                                                                                                                                                                                                                                                                                                                                                                                                                                                                                                                                                                                                                                                                                                                                                                                                                                                                                                                                                                                                                                                                                                                                                                                                                                                                                                                                                                                                                                                                                                                  | 5                                                                                                                                                                                                                                                                                                                                                                                                                                                                                                                                                                                                                                                                                                                                                                                                                                                                                                                                                                                                                                                                                                                                                                                                                                                                                                                                                                                                                                                                                                                                                                                                                                                                                                                                                                                                                                                                                                                                                                                                               | 6                                                                                                                                                                                                                                                                                                                                                                                                                                                                                                                                                                                                                                                                                                                                                                                                                                                                                         |
|--------------------------------------------------------------------------------------------------------------------------------------------------------------------------------------------------------------------------------------------------------------------------------------------------------------------------------------------------------------------------------------------------------------------------------------------------------------------------------------------------------------------------------------------------------------------------------------------------------------------------------------------------------------|---------------------------------------------------------------------------------------------------------------------------------------------------------|-----------------------------------------------------------------------------------------------------------------------------------------------------------------------------------------------------------------------------------------------------------------------------------------------------------------------------------------------------------------------------------------------------------------------------------------------------------------------------------------------------------------------------------------------------------------------------------------------------------------------------------------------------------------------------------------------------------------------------------------------------------------------------------------------------------------------------------------------------------------------------------------------------------------------------------------------------------------------------------------------------------------------------------------------------------------------------------------------------------------------------------------------------------------------------------------------------------------|------------------------------------------------------------------------------------------------------------------------------------------------------------------------------------------------------------------------------------------------------------------------------------------------------------------------------------------------------------------------------------------------------------------------------------------------------------------------------------------------------------------------------------------------------------------------------------------------------------------------------------------------------------------------------------------------------------------------------------------------------------------------------------------------------------------------------------------------------------------------------------------------------------------------------------------------------------------------------------------------------------------------------------------------------------------------------------------------------------------------------------------------------------------------------------------------------------------------------------------------------------------------------------------------------------------------------------------------------------------------------------------------------------------------------------------------------------------------------------------------------------------------------------------------------------------------------------------------------------------------------------|-----------------------------------------------------------------------------------------------------------------------------------------------------------------------------------------------------------------------------------------------------------------------------------------------------------------------------------------------------------------------------------------------------------------------------------------------------------------------------------------------------------------------------------------------------------------------------------------------------------------------------------------------------------------------------------------------------------------------------------------------------------------------------------------------------------------------------------------------------------------------------------------------------------------------------------------------------------------------------------------------------------------------------------------------------------------------------------------------------------------------------------------------------------------------------------------------------------------------------------------------------------------------------------------------------------------------------------------------------------------------------------------------------------------------------------------------------------------------------------------------------------------------------------------------------------------------------------------------------------------------------------------------------------------------------------------------------------------------------------------------------------------------------------------------------------------------------------------------------------------------------------------------------------------------------------------------------------------------------------------------------------------|-------------------------------------------------------------------------------------------------------------------------------------------------------------------------------------------------------------------------------------------------------------------------------------------------------------------------------------------------------------------------------------------------------------------------------------------------------------------------------------------------------------------------------------------------------------------------------------------------------------------------------------------------------------------------------------------------------------------------------------------------------------------------------------------------------------------------------------------------------------------------------------------|
| Conservation and Natural Environments                                                                                                                                                                                                                                                                                                                                                                                                                                                                                                                                                                                                                        | Production from Relatively Natural Environments                                                                                                         | Production from Dryland Agriculture and Plantations                                                                                                                                                                                                                                                                                                                                                                                                                                                                                                                                                                                                                                                                                                                                                                                                                                                                                                                                                                                                                                                                                                                                                             | Production from Irrigated Agriculture and Plantations                                                                                                                                                                                                                                                                                                                                                                                                                                                                                                                                                                                                                                                                                                                                                                                                                                                                                                                                                                                                                                                                                                                                                                                                                                                                                                                                                                                                                                                                                                                                                                              | Intensive Uses                                                                                                                                                                                                                                                                                                                                                                                                                                                                                                                                                                                                                                                                                                                                                                                                                                                                                                                                                                                                                                                                                                                                                                                                                                                                                                                                                                                                                                                                                                                                                                                                                                                                                                                                                                                                                                                                                                                                                                                                  | Water                                                                                                                                                                                                                                                                                                                                                                                                                                                                                                                                                                                                                                                                                                                                                                                                                                                                                     |
| <b>1.1.0 Nature conservation</b><br>1.1.1 Strict nature reserves<br>1.1.2 Wilderness area<br>1.1.3 National park<br>1.1.4 Natural feature protection<br>1.1.5 Habitat/species management area<br>1.1.6 Protected landscape<br>1.1.7 Other conserved area<br><br><b>1.2.0 Managed resource protection</b><br>1.2.1 Biodiversity<br>1.2.2 Surface water supply<br>1.2.3 Groundwater<br>1.2.4 Landscape<br>1.2.5 Traditional indigenous uses<br><br><b>1.3.0 Other minimal use</b><br>1.3.1 Defence land - natural areas<br>1.3.2 Stock route<br>1.3.3 Residual native cover<br>1.3.4 Rehabilitation<br><br>Minimum level of land use attribution in Queensland | <b>2.1.0 Grazing native vegetation</b><br><br><b>2.2.0 Production native forests</b><br>2.2.1 Wood production forestry<br>2.2.2 Other forest production | <b>3.1.0 Plantation forests</b><br>3.1.1 Hardwood plantation forestry<br>3.1.2 Softwood plantation forestry<br>3.1.3 Other forest plantation<br>3.1.4 Environmental forest plantation<br><br><b>3.2.0 Grazing modified pastures</b><br>3.2.1 Native/exotic pasture mosaic<br>3.2.2 Woody fodder plants<br>3.2.3 Pasture legumes<br>3.2.4 Pasture legume/grass mixtures<br>3.2.5 Sown grasses<br><br><b>3.3.0 Cropping</b><br>3.3.1 Cereals<br>3.3.2 Beverage and spice crops<br>3.3.3 Hay and silage<br>3.3.4 Oilseeds<br>3.3.5 Sugar<br>3.3.6 Cotton<br>3.3.7 Alkaloid poppies<br>3.3.8 Pulses<br><br><b>3.4.0 Perennial horticulture</b><br>3.4.1 Tree fruits<br>3.4.2 Olives<br>3.4.3 Tree nuts<br>3.4.4 Vine fruits<br>3.4.5 Shrub berries and fruits<br>3.4.6 Perennial flowers and bulbs<br>3.4.7 Perennial vegetables and herbs<br>3.4.8 Citrus<br>3.4.9 Grapes<br><br><b>3.5.0 Seasonal horticulture</b><br>3.5.1 Seasonal fruits<br>3.5.2 Seasonal flowers and bulbs<br>3.5.3 Seasonal vegetables and herbs<br><br><b>3.6.0 Land in transition</b><br>3.6.1 Degraded land<br>3.6.2 Abandoned land<br>3.6.3 Land under rehabilitation<br>3.6.4 No defined use<br>3.6.5 Abandoned perennial horticulture | <b>4.1.0 Irrigated plantation forests</b><br>4.1.1 Irrigated hardwood plantation forestry<br>4.1.2 Irrigated softwood plantation forestry<br>4.1.3 Irrigated other forest plantation<br>4.1.4 Irrigated environmental forest plantation<br><br><b>4.2.0 Grazing irrigated modified pastures</b><br>4.2.1 Irrigated woody fodder plants<br>4.2.2 Irrigated pasture legumes<br>4.2.3 Irrigated legume/grass mixtures<br>4.2.4 Irrigated sown grasses<br><br><b>4.3.0 Irrigated cropping</b><br>4.3.1 Irrigated cereals<br>4.3.2 Irrigated beverage and spice crops<br>4.3.3 Irrigated hay and silage<br>4.3.4 Irrigated oilseeds<br>4.3.5 Irrigated sugar<br>4.3.6 Irrigated cotton<br>4.3.7 Irrigated alkaloid poppies<br>4.3.8 Irrigated pulses<br>4.3.9 Irrigated rice<br><br><b>4.4.0 Irrigated perennial horticulture</b><br>4.4.1 Irrigated tree fruits<br>4.4.2 Irrigated olives<br>4.4.3 Irrigated tree nuts<br>4.4.4 Irrigated vine fruits<br>4.4.5 Irrigated shrub berries and fruits<br>4.4.6 Irrigated perennial flowers and bulbs<br>4.4.7 Irrigated perennial vegetables and herbs<br>4.4.8 Irrigated citrus<br>4.4.9 Irrigated grapes<br><br><b>4.5.0 Irrigated seasonal horticulture</b><br>4.5.1 Irrigated seasonal fruits<br>4.5.2 Irrigated seasonal flowers and bulbs<br>4.5.3 Irrigated seasonal vegetables and herbs<br>4.5.4 Irrigated turf farming<br><br><b>4.6.0 Irrigated land in transition</b><br>4.6.1 Degraded irrigated land<br>4.6.2 Abandoned irrigated land<br>4.6.3 Irrigated land under rehabilitation<br>4.6.4 No defined use - irrigation<br>4.6.5 Abandoned irrigated perennial horticulture | <b>5.1.0 Intensive horticulture</b><br>5.1.1 Production nurseries<br>5.1.2 Shadehouses<br>5.1.3 Glasshouses<br>5.1.4 Glasshouses - hydroponic<br>5.1.5 Abandoned intensive horticulture<br><br><b>5.2.0 Intensive animal production</b><br>5.2.1 Dairy sheds and yards<br>5.2.2 Feedlots<br>5.2.3 Poultry farms<br>5.2.4 Piggeries<br>5.2.5 Aquaculture<br>5.2.6 Horse studs<br>5.2.7 Sleyards/stockyards<br>5.2.8 Abandoned intensive animal production<br><br><b>5.3.0 Manufacturing and industrial</b><br>5.3.1 General purpose factory<br>5.3.2 Food processing factory<br>5.3.3 Major industrial complex<br>5.3.4 Bulk grain storage<br>5.3.5 Abattoirs<br>5.3.6 Oil refinery<br>5.3.7 Sawmill<br>5.3.8 Abandoned manufacturing and industrial<br><br><b>5.4.0 Residential and farm infrastructure</b><br>5.4.1 Urban residential<br>5.4.2 Rural residential with agriculture<br>5.4.3 Rural residential without agriculture<br>5.4.4 Remote communities<br>5.4.5 Farm buildings/infrastructure<br><br><b>5.5.0 Services</b><br>5.5.1 Commercial services<br>5.5.2 Public services<br>5.5.3 Recreation and culture<br>5.5.4 Defence facilities - urban<br>5.5.5 Research facilities<br><br><b>5.6.0 Utilities</b><br>5.6.1 Fuel powered electricity generation<br>5.6.2 Hydro electricity generation<br>5.6.3 Wind electricity generation<br>5.6.4 Solar electricity generation<br>5.6.5 Electricity substations and transmission<br>5.6.6 Gas treatment, storage and transmission<br>5.6.7 Water extraction and transmission<br><br><b>5.7.0 Transport and communication</b><br>5.7.1 Airports/aerodromes<br>5.7.2 Roads<br>5.7.3 Railways<br>5.7.4 Ports and water transport<br>5.7.5 Navigation and communication<br><br><b>5.8.0 Mining</b><br>5.8.1 Mines<br>5.8.2 Quarries<br>5.8.3 Tailings<br>5.8.4 Extractive industry not in use<br><br><b>5.9.0 Waste treatment and disposal</b><br>5.9.1 Effluent pond<br>5.9.2 Landfill<br>5.9.3 Solid garbage<br>5.9.4 Incinerators<br>5.9.5 Sewage/sewerage | <b>6.1.0 Lake</b><br>6.1.1 Lake - conservation<br>6.1.2 Lake - production<br>6.1.3 Lake - intensive use<br>6.1.4 Lake - saline<br><br><b>6.2.0 Reservoir/dam</b><br>6.2.1 Reservoir<br>6.2.2 Water storage - intensive use/farm dams<br>6.2.3 Evaporation basin<br><br><b>6.3.0 River</b><br>6.3.1 River - conservation<br>6.3.2 River - production<br>6.3.3 River - intensive use<br><br><b>6.4.0 Channel/aqueduct</b><br>6.4.1 Supply channel/aqueduct<br>6.4.2 Drainage channel/aqueduct<br>6.4.3 Stormwater<br><br><b>6.5.0 Marsh/wetland</b><br>6.5.1 Marsh/wetland - conservation<br>6.5.2 Marsh/wetland - production<br>6.5.3 Marsh/wetland - intensive use<br>6.5.4 Marsh/wetland - saline<br><br><b>6.6.0 Estuary/coastal waters</b><br>6.6.1 Estuary/coastal waters - conservation<br>6.6.2 Estuary/coastal waters - production<br>6.6.3 Estuary/coastal waters - intensive use |

SI Figure 9: ALUM Classification Scheme (ABARES 2016, The Australian Land Use and Management Classification Version 8, Australian Bureau of Agricultural and Resource Economics and Sciences, Canberra. CC BY 3.0.).
